# Supplementary figures and images for: Wntless regulates lipogenic gene expression in adipocytes and protects against diet-induced metabolic dysfunction
Source: PubMed Central journal article supplement — Mol Metab. 2020 Apr 20;39:100992. doi: 10.1016/j.molmet.2020.100992 (PMC7264081; doi:10.1016/j.molmet.2020.100992), 2020-04-20

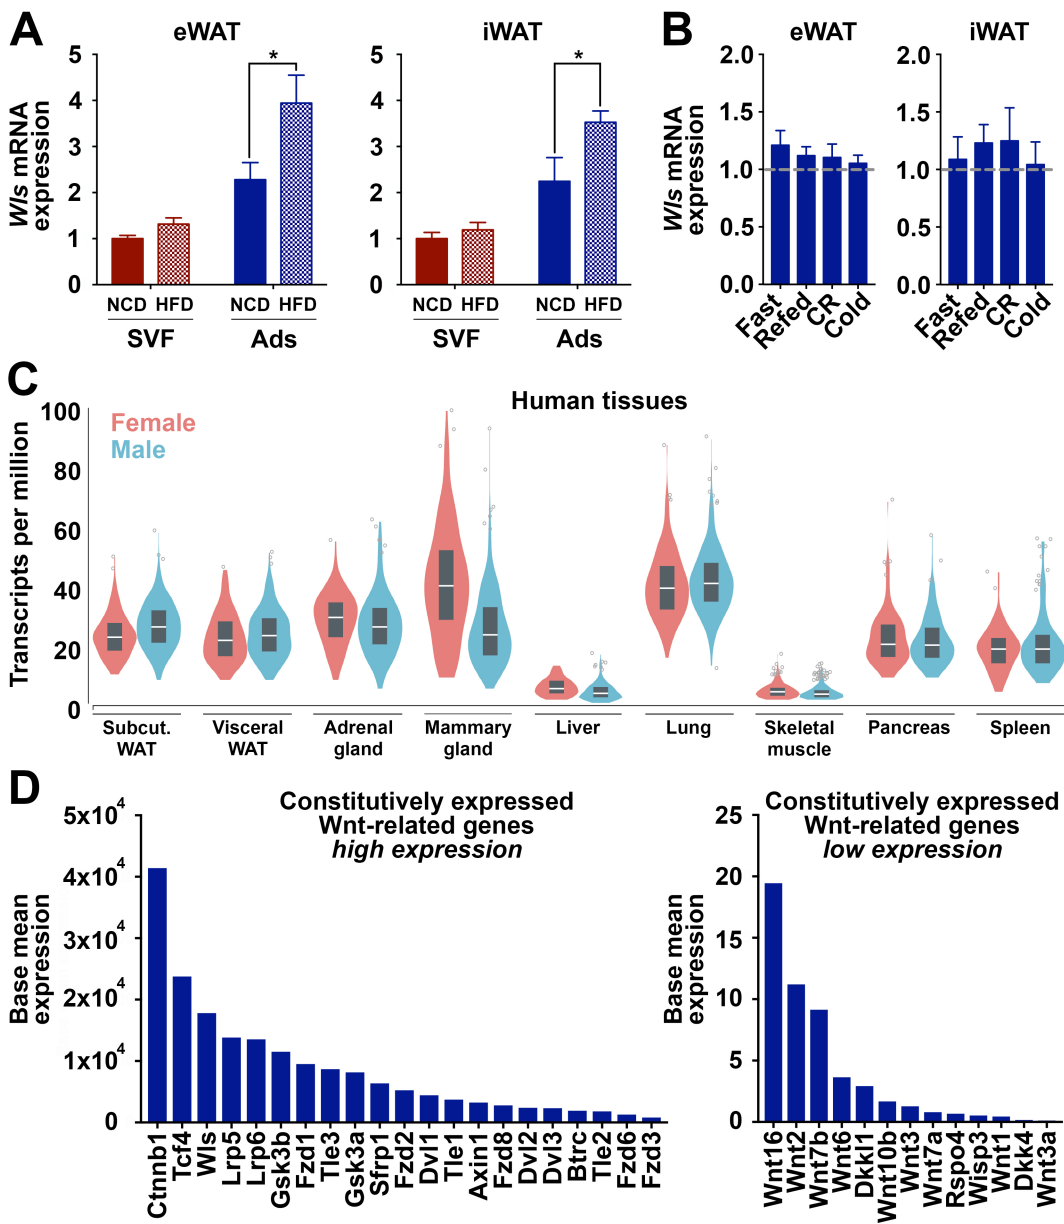

Supplement: mmc1.pdf [file mmc1.pdf]

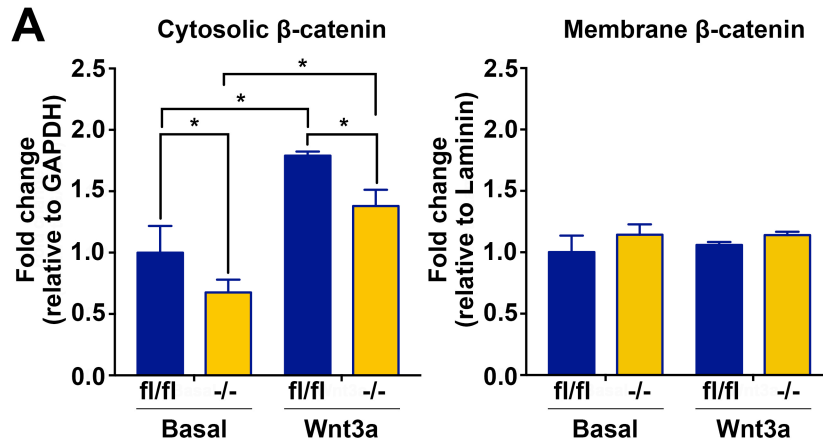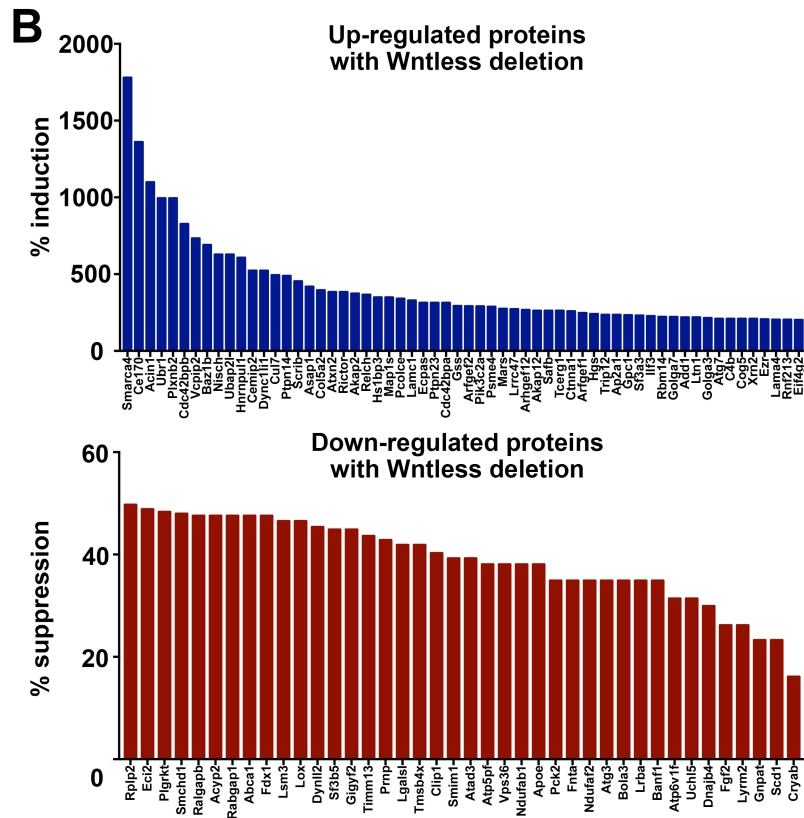

Supplement: mmc2.pdf [file mmc2.pdf]

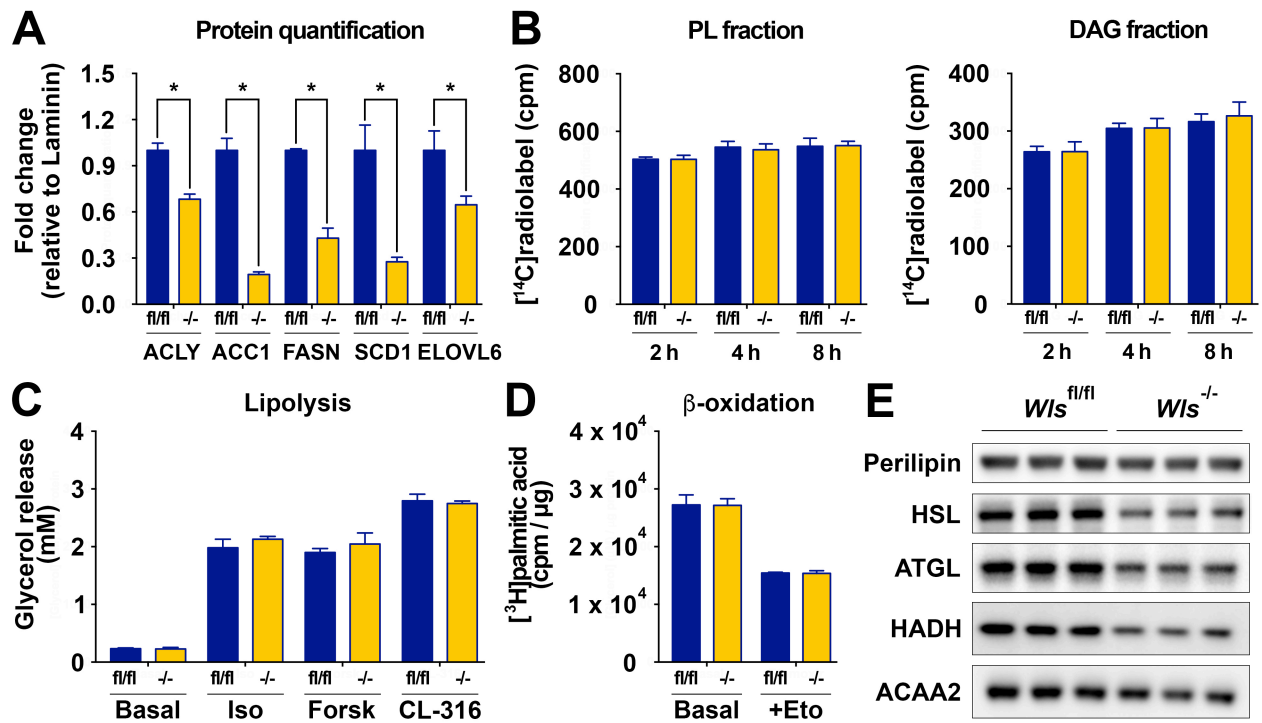

Supplement: mmc3.pdf [file mmc3.pdf]

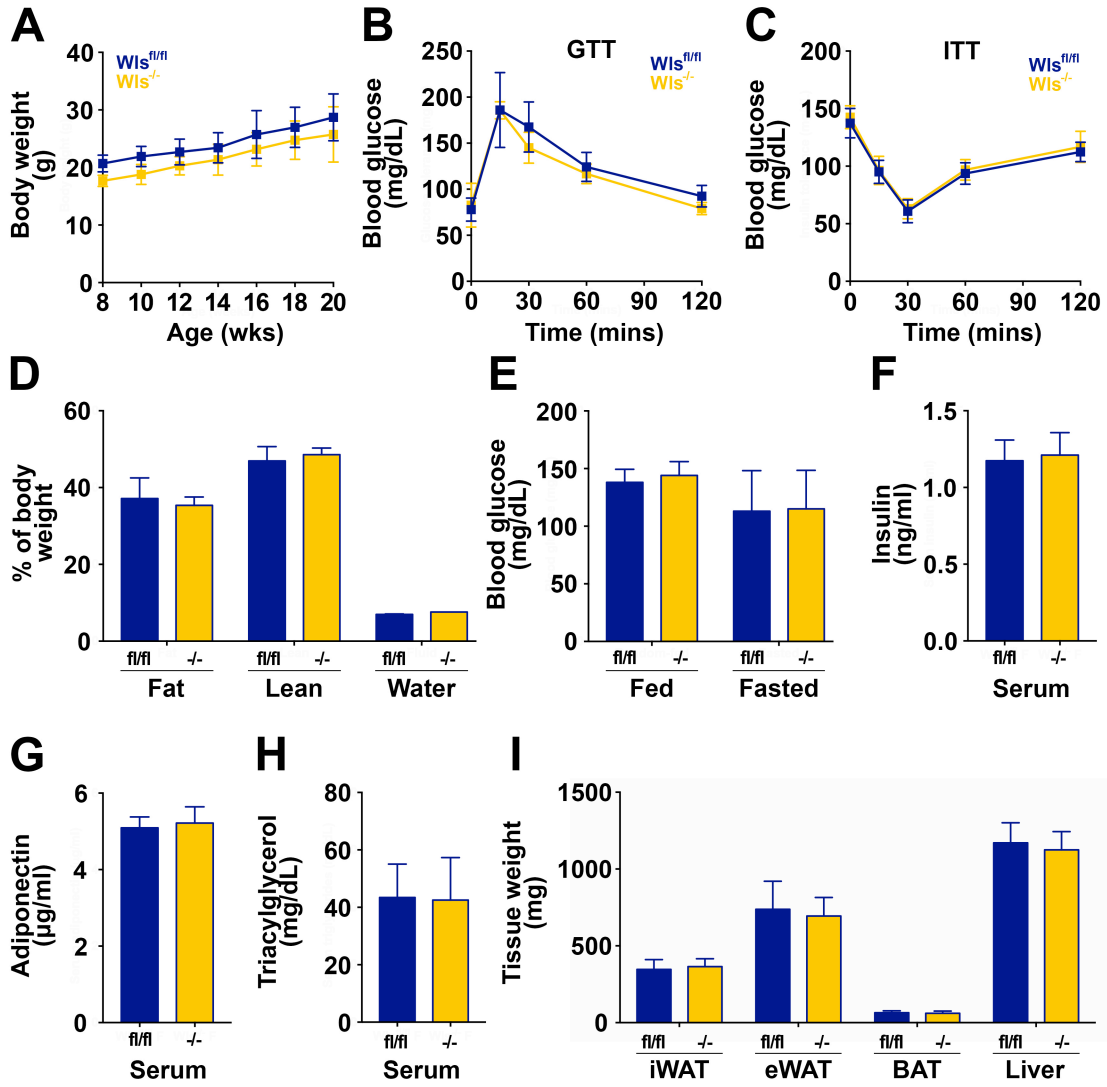

Supplement: mmc4.pdf [file mmc4.pdf]

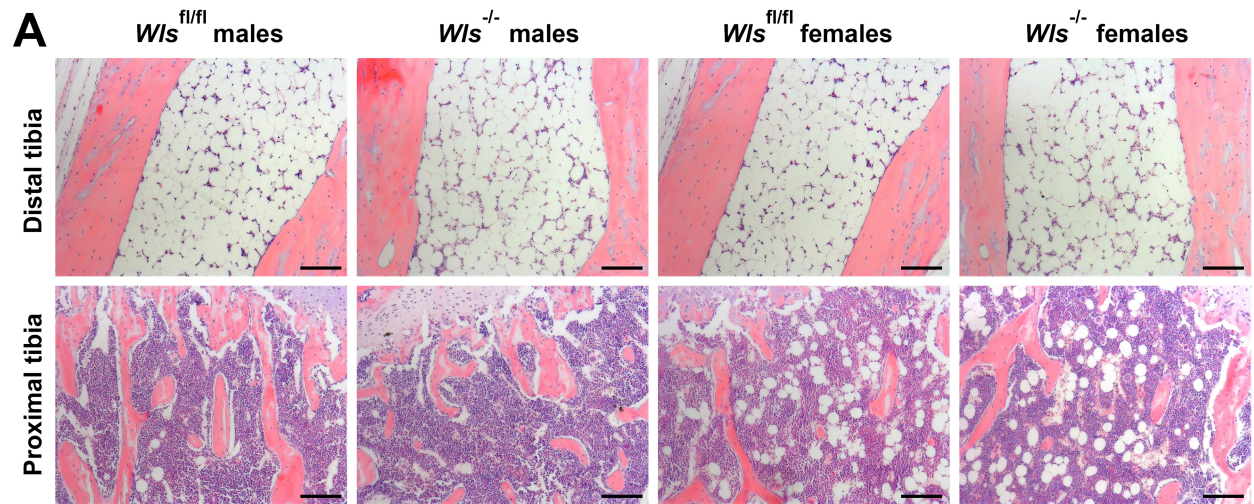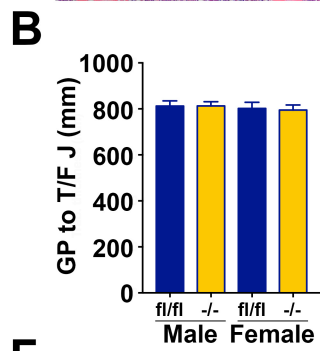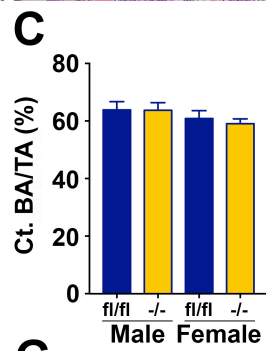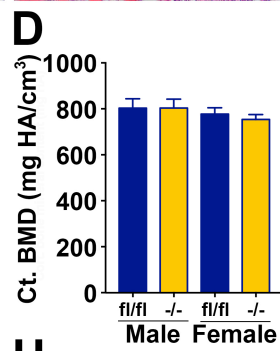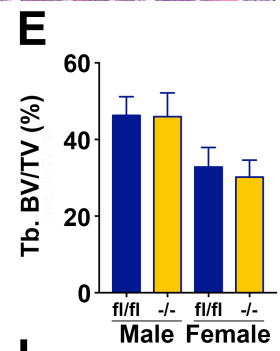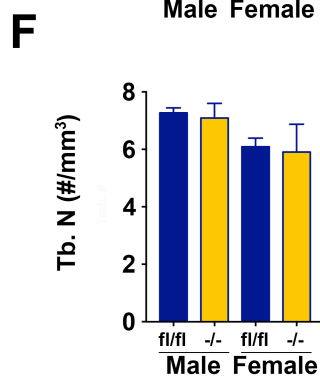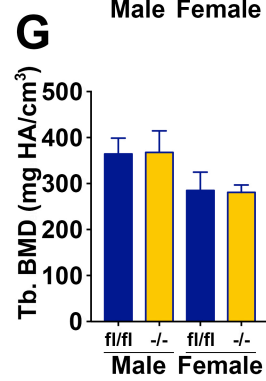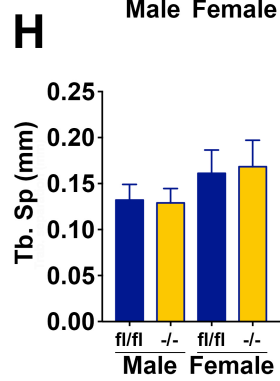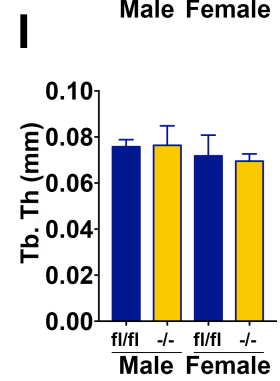

Supplement: mmc5.pdf [file mmc5.pdf]

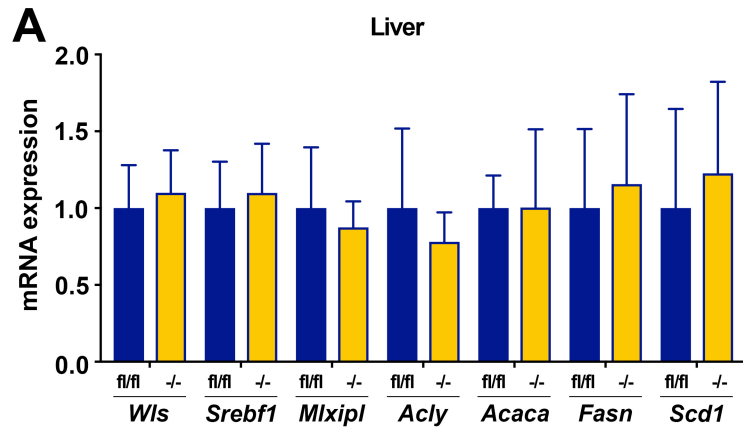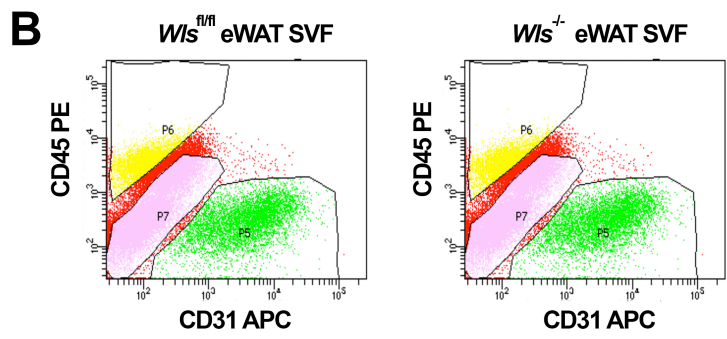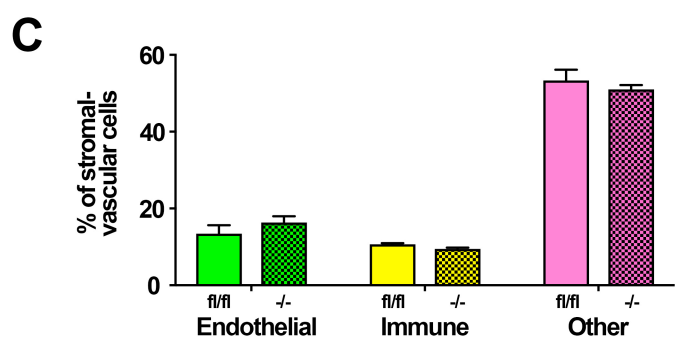

Supplement: mmc6.pdf [file mmc6.pdf]

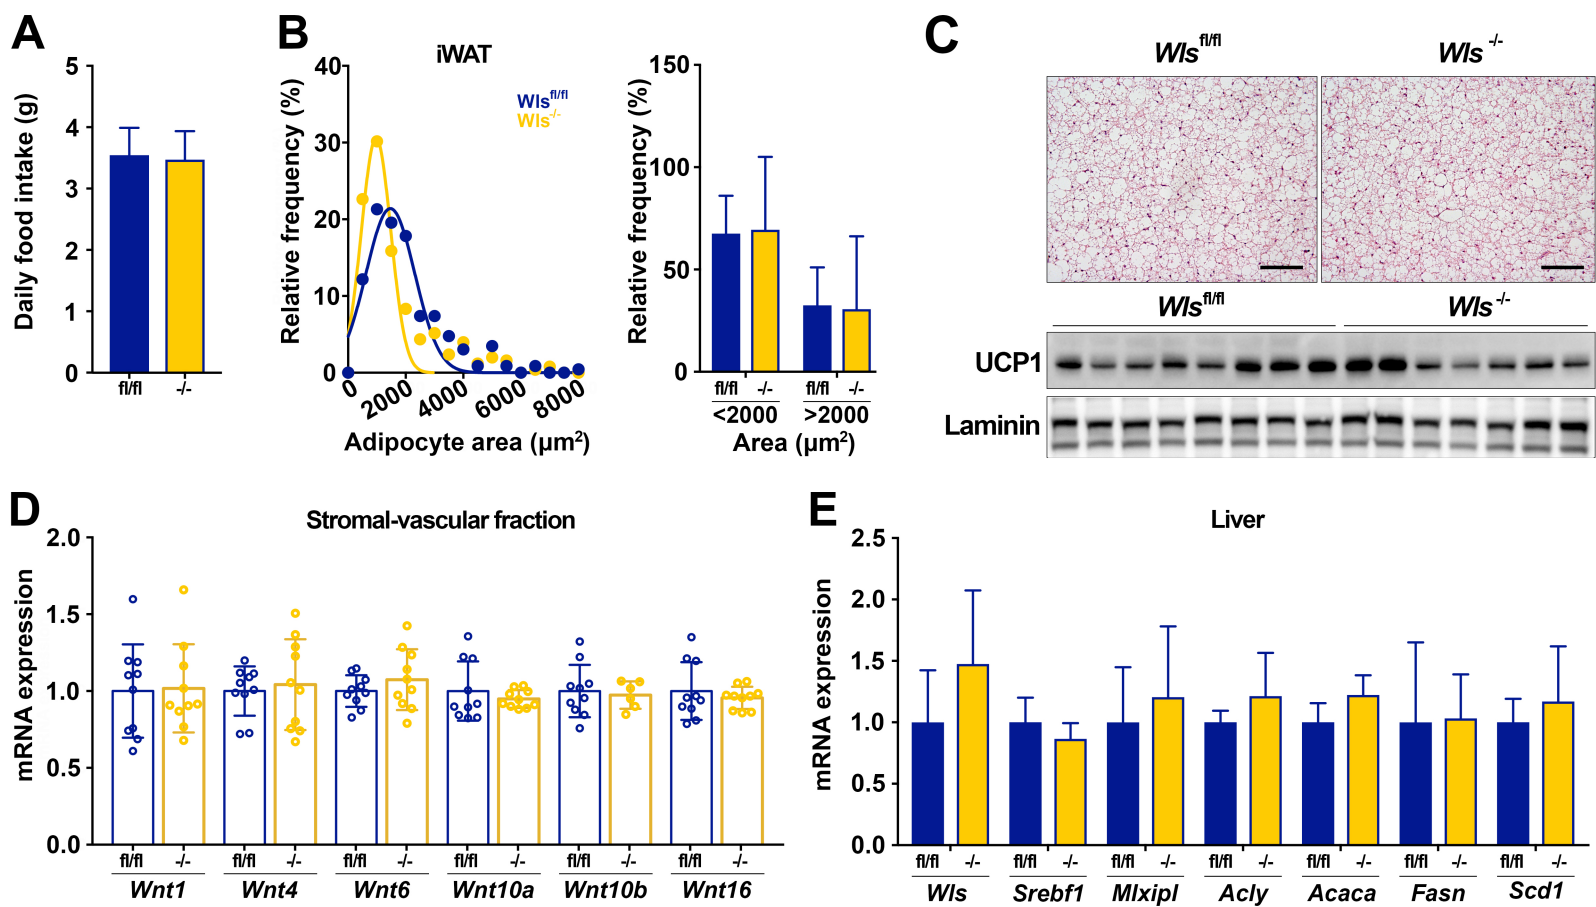

Supplement: mmc7.pdf [file mmc7.pdf]
